# Supplementary material
Source: publisher figshare collection journal article supplement (https://diabetesjournals.figshare.com/articles/dataset/_/23780670)
Supplement: Supplementary file 1 [file 1]

## Appendix. ABCD Closed-Loop audit contributors

| <b>Site</b>                                                                              | <b>Contributors</b>                                                                                                                                                        |
|------------------------------------------------------------------------------------------|----------------------------------------------------------------------------------------------------------------------------------------------------------------------------|
| Cambridge University Hospitals NHS Foundation Trust, Addenbrookes Hospital               | Mark Evans, Eleanor Gurnell, Sara Hartnell, Katy Davenport, Iona O'Reilly, Helen Brown                                                                                     |
| County Durham and Darlington NHS Foundation Trust, Darlington Memorial Hospital          | Shafie Kamaruddin, Sharon Pickering, Kamal Abougilia                                                                                                                       |
| East Suffolk and North Essex NHS Foundation Trust, Ipswich Hospital                      | Claire Wadham, Gerry Rayman                                                                                                                                                |
| Guy's and St Thomas' NHS Foundation Trust                                                | Sufyan Hussain, Anna Brackenridge, Siobhan Pender, Rosarie Atkinson, Melanie Bahadur, Hatem Eid                                                                            |
| Harrogate And District; NHS Foundation Trust, Harrogate District Hospital                | Janet Carling, Linzi Oldfield, Christopher Philbey, Peter Hammond                                                                                                          |
| King's College Hospital NHS Foundation Trust, King's College Hospital (Denmark Hill)     | Sean Haywood, Geraldine Gallen, Helen Rodgers, Kaylee Lovie, Emma Whight, Georgia Nobel-Bell, Sophie Harris                                                                |
| Liverpool University Hospitals NHS Foundation Trust, Aintree University Hospital         | Anne Cartwright, Ian Garnett, Jennifer Harvey, Frances McCulloch, Yew Wen Yap                                                                                              |
| Liverpool University Hospitals NHS Foundation Trust, Royal Liverpool University Hospital | Philip Weston                                                                                                                                                              |
| Manchester University NHS Foundation Trust, Manchester Royal Infirmary                   | Alyson Chapman, Lynne Findlow, Lalantha Leelarathna, Sheetal Ohol, Hood Thabit, Andrea Urwin, Darron Cowlam, Sonia Thomas, Emma Hyland, Zoey Yearsley, Johnathan Schofield |
| Nottingham University Hospitals NHS Trust, Nottingham City Hospital                      | Clare Soar                                                                                                                                                                 |
| Nottingham University Hospitals NHS Trust, Queens Medical Center                         | Laura Fenn, Budd Mendis, Zin Zin Htike                                                                                                                                     |
| North Bristol NHS Trust, Southmead Hospital                                              | Elizabeth Cheyne, Julie Emsley, Elisabeth Jones, Vernon Parfitt, Lynn Sawyer                                                                                               |

|                                                                                        |                                                                                                                                                                                                                                                                    |
|----------------------------------------------------------------------------------------|--------------------------------------------------------------------------------------------------------------------------------------------------------------------------------------------------------------------------------------------------------------------|
| Oxford University Hospitals NHS Trust, Churchill Hospital                              | Santo Colosimo, Shani Apsara Dilrukshi Mathara<br>Diddhenipothage, Alistair Lumb, Katie Hards, Florence Edohen                                                                                                                                                     |
| Portsmouth Hospitals NHS Trust, Queen Alexandra Hospital                               | Sue Beaden, Iain Cranston, Julie Taylor, Lisa Skinner                                                                                                                                                                                                              |
| Royal Surrey County Hospital NHS Foundation Trust, Royal Surrey County Hospital        | Zosanglura Bawlchhim, Bev Tuthill                                                                                                                                                                                                                                  |
| Sandwell & West Birmingham NHS Trust, City Hospital                                    | Melissa Louise Cull, Robert E J Ryder                                                                                                                                                                                                                              |
| Sheffield Teaching Hospitals NHS Foundation Trust, Northern General Hospital           | Sarah Mitchell, Jill Rimell, Clare Foley, Carla Gianfrancesco, Jackie Elliott                                                                                                                                                                                      |
| Somerset NHS Foundation Trust, Musgrove Park Hospital                                  | Sally Butter, Giorgio Carrieri, Isy Douek, Rhodri King, Paul Lambert, Paula Lionetti                                                                                                                                                                               |
| St Helens And Knowsley Hospitals NHS Trust, St Helens Hospital                         | Janet Cardwell, Niall Furlong, Suzanne Keigan, Rachael Milne, Philomena Wilkinson                                                                                                                                                                                  |
| The Newcastle Upon Tyne Hospitals NHS Foundation Trust, The Royal Victoria Infirmary   | Siobhan Ashton-Cleary, Sarah White                                                                                                                                                                                                                                 |
| The Whittington Hospital NHS Trust, The Whittington Hospital                           | Karen Anthony, Stefania Ribul Mazzola, Stephanie Sweeney                                                                                                                                                                                                           |
| University Hospitals Birmingham NHS Foundation Trust                                   | Parth Narendran, Ali Karamat, Sanjay Saraf, Barbara Hudson, Manyee Li, Rebecca Skelding, Lisa Williams, Karen Bartha, Anna-Marie Jesson, Lynn Grandy, Deborah Brewer, Joanne Edwards, Nicola Sears, Manjit Shergil                                                 |
| University of Hospitals of Derby and Burton NHS Foundation Trust, Royal Derby Hospital | Andy Baldwin, Thomas Crabtree, Isabelle Van Heeswijk, Linn Langeland, Nicola Taylor, Emma Wilmot, Sarah Owen, Rachel Taylor, Emma Robinson, Mohammed Bakhit, Amy Redfern, Cathy Kedge, Christine Kotonya, Haleema Hayat, Katy Gerrard, Nicci Pearson, Zara Redfern |
| University Hospitals of Dorset NHS Foundation Trust, Royal Bournemouth Hospital        | Louise Curtis, Alison Galea, Melanie Weiss, Nikki Stacey, Helen Partridge                                                                                                                                                                                          |

|                                                                                     |                                                                  |
|-------------------------------------------------------------------------------------|------------------------------------------------------------------|
| University Hospitals of Leicester NHS Trust, Leicester General Hospital             | Pratik Choudhary, Tomás Griffin, Dawn Ackroyd, Liz Turrell       |
| University Hospitals Sussex NHS Foundation Trust, Royal Sussex County Hospital      | Ali J Chakera, Vicki Lambert, Alison Suarez                      |
| University Hospitals Sussex NHS Foundation Trust, Worthing Hospital                 | Jesina Kirby, Nicola Lloyd, Eleni Karathenasi, Samantha McKinnon |
| University Hospitals Sussex NHS Foundation Trust, Princess Royal Hospital           | Mindy Levitt, Raj Govindan, Becky Haskoll                        |
| Warrington and Halton Teaching Hospitals NHS Foundation Trust , Warrington Hospital | Simon Saunders                                                   |
| West Hertfordshire Hospitals NHS Trust, Watford General Hospital                    | Razak Kehinde, James Lee, Thomas Galliford                       |
| Yeovil District Hospital NHS Foundation Trust, Yeovil District Hospital             | Alex Bickerton, Ruth Hammond, Ruth Walker                        |
