# Supplementary material
Source: publisher figshare collection journal article supplement (https://diabetesjournals.figshare.com/articles/dataset/_/23780670)
Supplement: Supplementary file 2 [file 1]

Supplement 1. Consort flow diagram for inclusion in this study

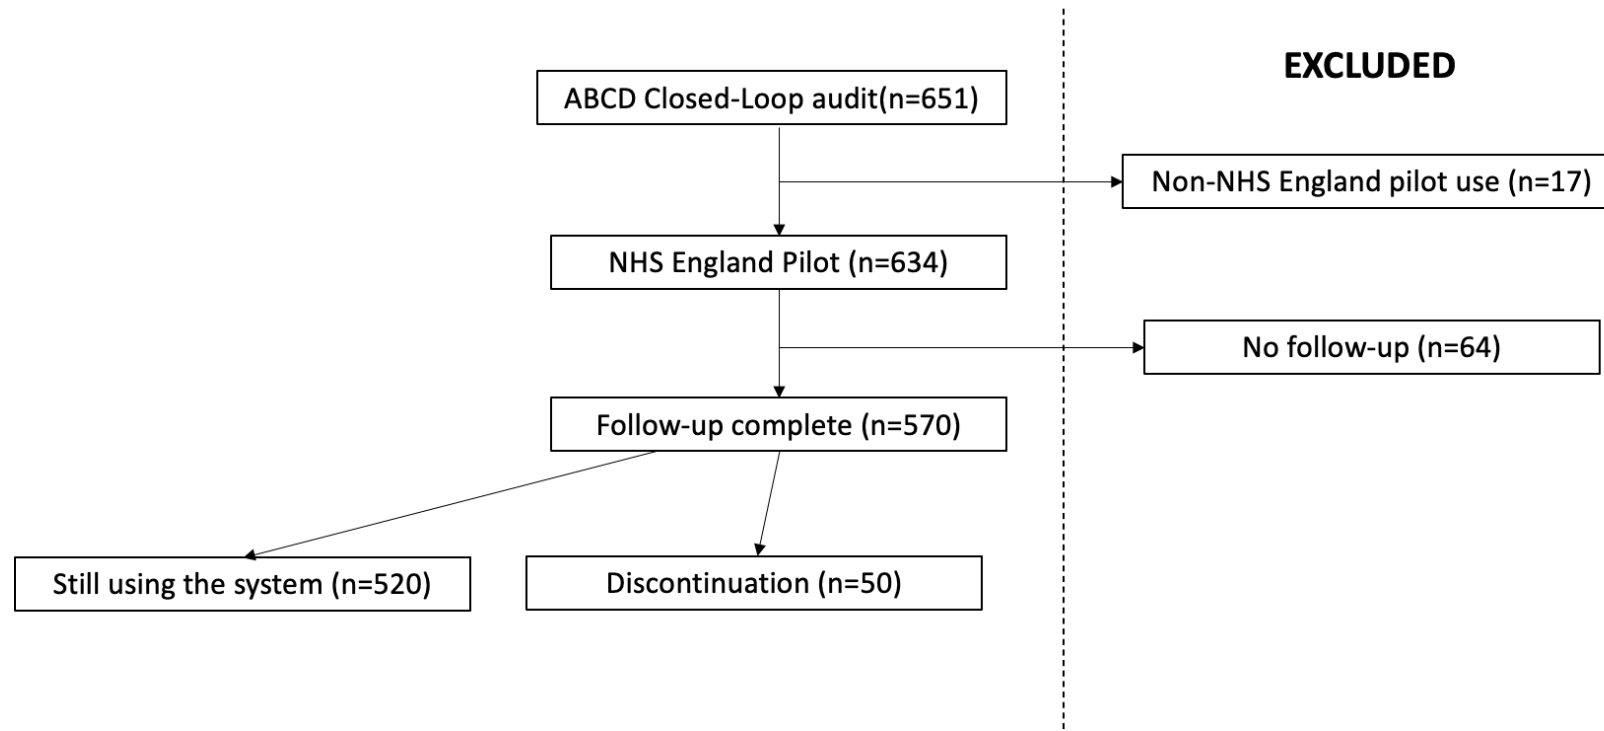

*Supplement 2. Baseline characteristics including sensitivity analysis*

| Baseline Characteristics                                 | All<br>n=634 | Follow-up Complete<br>n=520 | Discontinued/<br>Missing<br>n=114 | P-Value |
|----------------------------------------------------------|--------------|-----------------------------|-----------------------------------|---------|
| Age, Years <sup>†</sup>                                  | 40 (29-50)   | 40 (29-51)                  | 38 (26-47)                        | 0.27    |
| Diabetes Duration, Years <sup>†</sup>                    | 21 (14-30)   | 21 (15-30)                  | 21 (14-32)                        | 0.95    |
| Pump Duration, Year <sup>†</sup>                         | 8 (5-11)     | 8 (5-11)                    | 7 (4-10)                          | 0.49    |
| Weight, kg*                                              | 81±18        | 82±18                       | 79±15                             | 0.21    |
| Body Mass Index, kg/m <sup>2</sup> *                     | 29±6         | 29±6                        | 28±5                              | 0.26    |
| Median index of multiple deprivation decile <sup>†</sup> | 6(3-8)       | 6 (3-8)                     | 5 (3-8)                           | 0.10    |
| Most deprived quintile of deprivation <sup>‡</sup>       | 65 (10)      | 50 (10)                     | 15 (13)                           | 0.26    |
| <b>Gender<sup>‡</sup></b>                                |              |                             |                                   | 0.90    |
| Female                                                   | 425 (67)     | 348 (67)                    | 77 (68)                           |         |
| Male                                                     | 209 (33)     | 172 (33)                    | 37 (32)                           |         |
| <b>Ethnicity<sup>‡</sup></b>                             |              |                             |                                   | 0.70    |
| White - British                                          | 537 (85)     | 433 (83)                    | 104 (91)                          |         |
| White - Other                                            | 14 (2)       | 11 (2)                      | 3 (3)                             |         |
| Mixed                                                    | 10 (2)       | 10 (2)                      | 0 (0)                             |         |
| Asian                                                    | 16 (3)       | 14 (3)                      | 2 (2)                             |         |
| Black                                                    | 7 (1)        | 6 (1)                       | 1 (1)                             |         |
| Other                                                    | 5 (1)        | 4 (1)                       | 1 (1)                             |         |
| Unknown                                                  | 45 (7)       | 42 (8)                      | 3 (3)                             |         |
| <b>HbA1c/CGM Metrics*</b>                                |              |                             |                                   |         |
| Mean HbA1c, %                                            | 9.4±0.9      | 9.4±0.9                     | 9.3±0.9                           | 0.25    |
| Mean HbA1c, mmol/mol                                     | 79±10        | 79±10                       | 78±10                             | 0.25    |
| Total Daily Insulin Dose, units                          | 50±30        | 51±31                       | 46±18                             | 0.14    |

|                                                    |          |          |         |       |
|----------------------------------------------------|----------|----------|---------|-------|
| Glucose Management Indicator, mmol/mol             | 72±11    | 72±11    | 74±13   | 0.13  |
| Time above 14mmol/L, %                             | 39±20    | 38±19    | 43±23   | 0.03  |
| Time above range (10.1-13.9mmol/L), %              | 26±11    | 27±11    | 23±12   | 0.01  |
| Time in range (3.9-10mmol/L), %                    | 34±15    | 34±15    | 33±17   | 0.41  |
| Time below range, Level 1 (3-3.8mmol/L), %         | 2±2      | 2±2      | 2±2     | 0.85  |
| Time below range, Level 2 (<3mmol/L), %            | 0±1      | 0±1      | 0±1     | 0.74  |
| Number of scans per day at baseline                | 7±6      | 7±6      | 8±7     | 0.28  |
| Coefficient of variation                           | 38±7     | 38±7     | 38±6    | 0.66  |
| <b>Insulin Pump/Closed-Loop System<sup>‡</sup></b> |          |          |         | 0.001 |
| Medtronic 780G                                     | 303 (48) | 241 (46) | 62 (54) |       |
| Tandem Control IQ                                  | 217 (34) | 193 (37) | 24 (21) |       |
| CAMAPS FX                                          | 31 (5)   | 27 (5)   | 4 (4)   |       |
| Medtrum                                            | 31 (5)   | 19 (4)   | 12 (11) |       |
| Medtronic 670G                                     | 8 (1)    | 8 (2)    | 0 (0)   |       |
| Not recorded                                       | 44 (7)   | 32 (6)   | 12 (11) |       |

\*Data reported as mean±standard deviation; P-Value comparing those with and without follow-up derived from unpaired T-Test

<sup>†</sup>Data report as median (Interquartile range); P-Value comparing those with and without follow-up derived from Mann Whitney U (Wilcoxon Rank Sum) tests

<sup>‡</sup>Data reported as number (percentage); P-Value comparing those with and without follow-up derived from Chi-2 testing

*Supplement 3. Table showing baseline & follow-up time spent in glucose ranges where complete sensor data was available (n=380)*

|                             | <b>Baseline</b> | <b>Follow-up</b> |
|-----------------------------|-----------------|------------------|
| <b>Time &lt;54mg/dL, %</b>  | 0.3             | 0.3              |
| <b>Time 54-69mg/dL %</b>    | 1.8             | 1.2              |
| <b>Time 70-180mg/dL, %</b>  | 34.2            | 61.7             |
| <b>Time 181-250mg/dL %</b>  | 26.8            | 22.3             |
| <b>Time &gt;250mg/dL, %</b> | 36.9            | 14.5             |

Supplement 4. Hospital admission, paramedic call-out and severe hypoglycemia event rates at baseline and follow-up

|                      |                            | Events per 10 person-years |           |          |
|----------------------|----------------------------|----------------------------|-----------|----------|
|                      |                            | Baseline                   | Follow-up | P-Value† |
| Admission            | Hyperglycemia/Ketoacidosis | 0.7                        | 1.1       | 0.458    |
|                      | Severe Hypoglycemia        | 0.2                        | 0.1       | 0.483    |
|                      | Other (Diabetes related)‡  | 0.1                        | 0.2       | 0.209    |
|                      | Other (Any)                | 1.0                        | 0.7       | 0.08     |
| Paramedic call-out*  | Hyperglycemia/Ketoacidosis | 0.2                        | 0.0       | 0.005    |
|                      | Severe Hypoglycemia        | 0.3                        | 0.7       | 0.581    |
|                      | Other (Diabetes related)‡  | 0.1                        | 0.0       | 0.564    |
|                      | Other (Any)                | 0.3                        | 0.1       | 0.020    |
| Severe hypoglycemia§ |                            | 3.4                        | 2.1       | 0.380    |

\*Call-outs not resulting in hospital admission

†P-Value derived from Mann Whitney U (Wilcoxon Rank Sum) tests due to skew

‡For example, admission due to foot disease, gastroparesis, insulin overdose

§Using the standard definition of requiring third-party assistance to treat

*Supplement 5. Number of participants at each center included in analysis (n=520)*

| <b>Centre</b>                                  | <b>Number of HCL users</b> |
|------------------------------------------------|----------------------------|
| Aintree University Hospital, Liverpool         | 6                          |
| Addenbrookes Hospital, Cambridge               | 23                         |
| Churchill Hospital, Oxford                     | 22                         |
| Darlington Memorial Hospital                   | 4                          |
| University Hospitals of Derby and Burton       | 52                         |
| Guy's and St Thomas', London                   | 16                         |
| Harrogate District Hospital                    | 17                         |
| Ipswich Hospital                               | 9                          |
| King's College Hospital (Denmark Hill), London | 26                         |
| Leicester General Hospital                     | 44                         |
| Manchester Royal Infirmary                     | 20                         |
| Musgrove Park Hospital                         | 8                          |
| Sheffield Teaching Hospitals                   | 27                         |
| Nottingham City Hospital                       | 6                          |
| Princess Royal Hospital, Telford               | 6                          |
| Queen Alexandra Hospital, Portsmouth           | 21                         |
| Queen Elizabeth Hospital Birmingham            | 70                         |
| Queens Medical Centre, Nottingham              | 11                         |
| Royal Bournemouth Hospital                     | 18                         |
| Royal Liverpool University Hospital            | 10                         |
| Royal Surrey County Hospital                   | 7                          |
| Royal Sussex County Hospital                   | 8                          |
| Southmead Hospital                             | 12                         |
| St Helens Hospital                             | 26                         |
| The Royal Victoria Infirmary, Newcastle        | 10                         |
| The Whittington Hospital                       | 2                          |
| University of Hospital North Durham            | 12                         |
| Warrington Hospital                            | 8                          |
| Watford General Hospital                       | 3                          |
| Worthing Hospital                              | 9                          |
| Yeovil District Hospital                       | 7                          |
